# Supplementary material
Source: publisher site journal article supplement (https://www.aging-us.com/papers/v7/n11/pdf/100838.pdf)
Supplement: Supplementary file 1 [file 100838.pdf]

Aging
